# Supplementary figures and images for: Luks-PV induce HOXA9 degradation through autophagy in Acute myeloid leukemia with HOXA9 overexpression
Source: Research Square preprint supplement (doi:10.21203/rs.3.rs-56347/v2), 2022-07-15

Fig 1


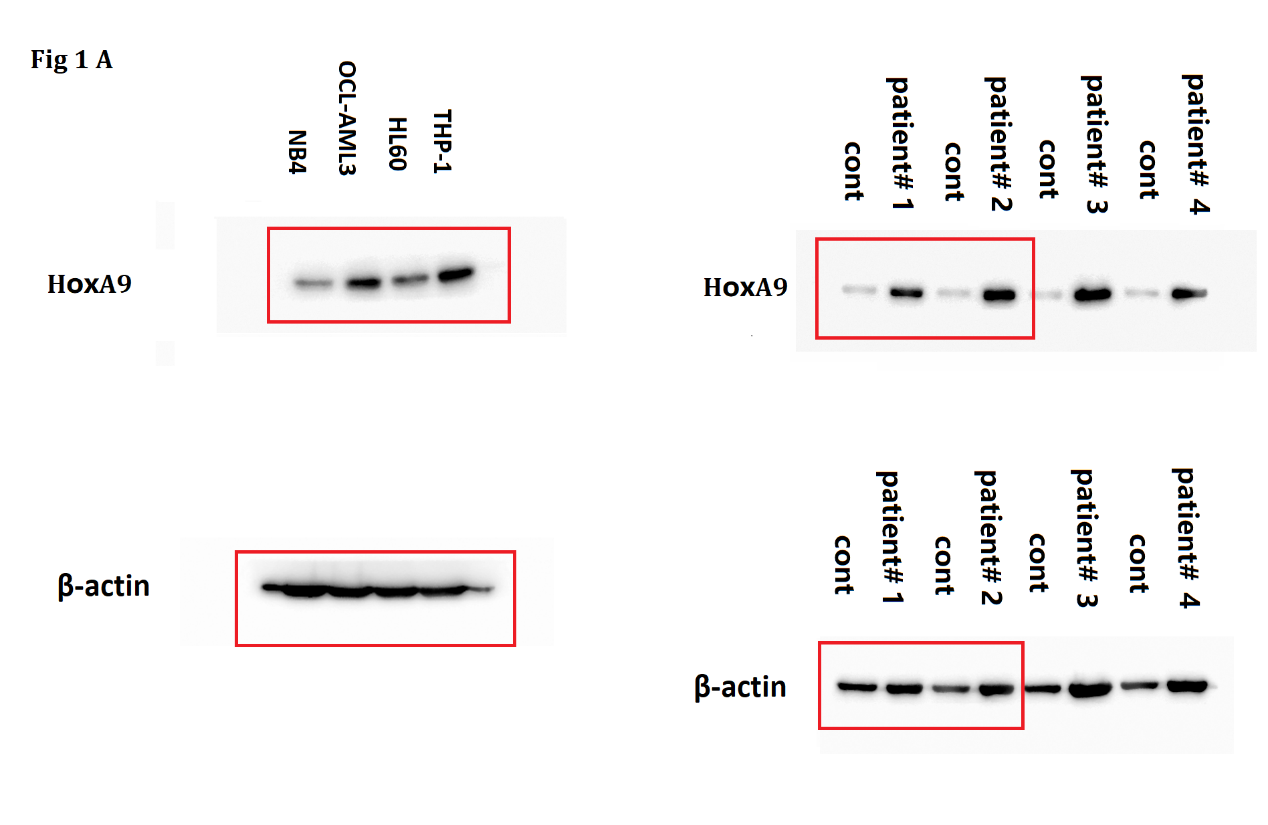


Fig 2


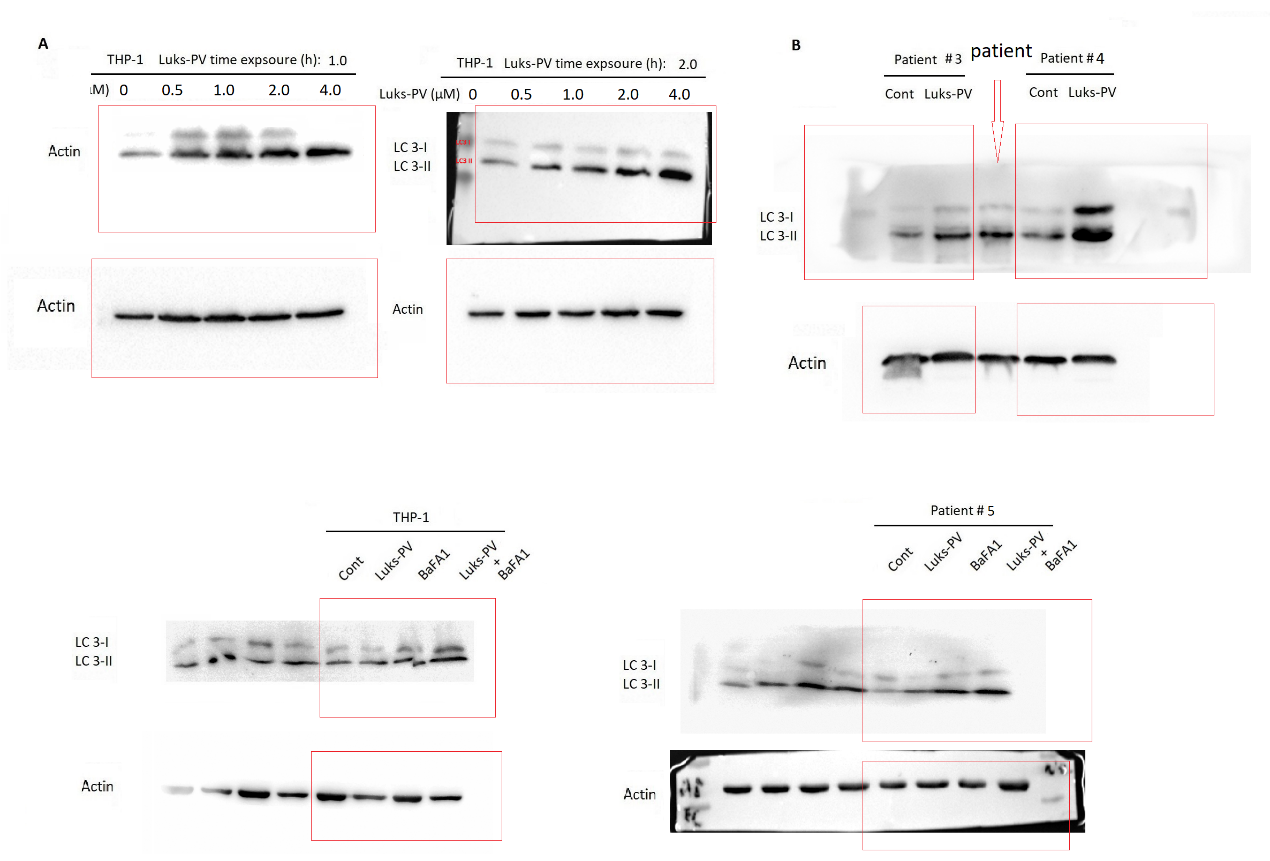


Fig 3


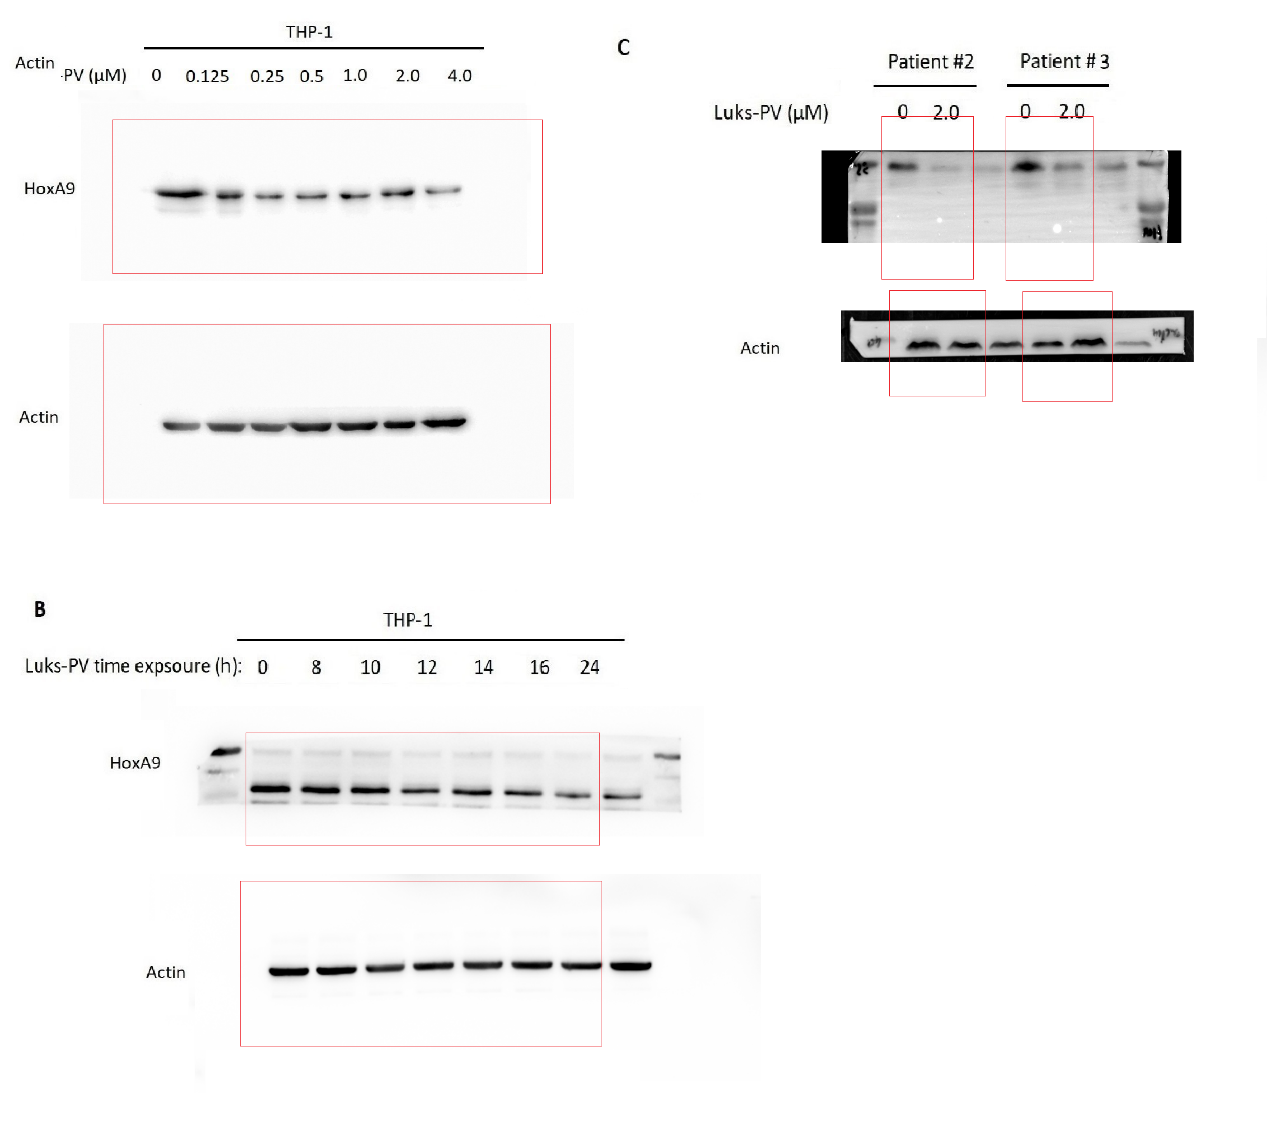


Fig 4


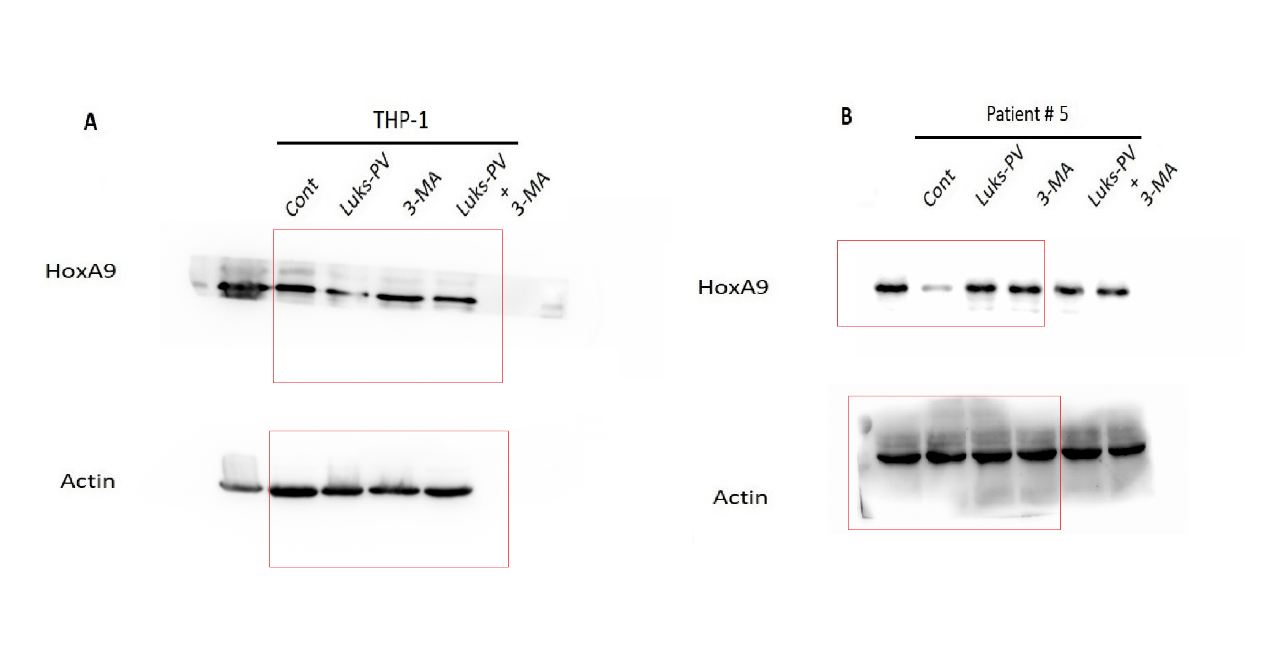

Supplement: Supplementary file 1 [file 92fd2c5a42adb33d513f53e4.docx]
